# Supplementary material for: Highly active and stable interface derived from Pt supported on Ni/Fe layered double oxides for HCHO oxidation
Source: Royal Society of Chemistry journal article supplement (doi:10.1039/c7cy00154a), 2017-01-01
Supplement: c7cy00154a1.pdf [file c7cy00154a1.pdf]

## Supporting information

### Highly active and stable interface derived from Pt supported Ni/Fe layered double oxides for HCHO oxidation

Mengya Lin,<sup>†,‡</sup> Xiaolin Yu,<sup>\*,†</sup> Xueqin Yang,<sup>†,‡</sup> Kezhi Li,<sup>#</sup> Maofa Ge,<sup>\*,†,‡,§</sup> Junhua Li

#

<sup>†</sup>State Key Laboratory for Structural Chemistry of Unstable and Stable Species,  
Beijing National Laboratory for Molecular Sciences (BNLMS), Institute of Chemistry,  
Chinese Academy of Sciences, Beijing 100190, P. R. China

<sup>‡</sup>University of Chinese Academy of Sciences, Beijing 100049, P. R. China

<sup>§</sup>Center for Excellence in Regional Atmospheric Environment, Institute of Urban  
Environment, Chinese Academy of Sciences, Xiamen, 361021, P. R. China

<sup>#</sup>State Key Joint Laboratory of Environment Simulation and Pollution Control, School  
of Environment, Tsinghua University, Beijing, 100084, P. R. China

\*Email: icecoolyu@iccas.ac.cn; gemaofa@iccas.ac.cn

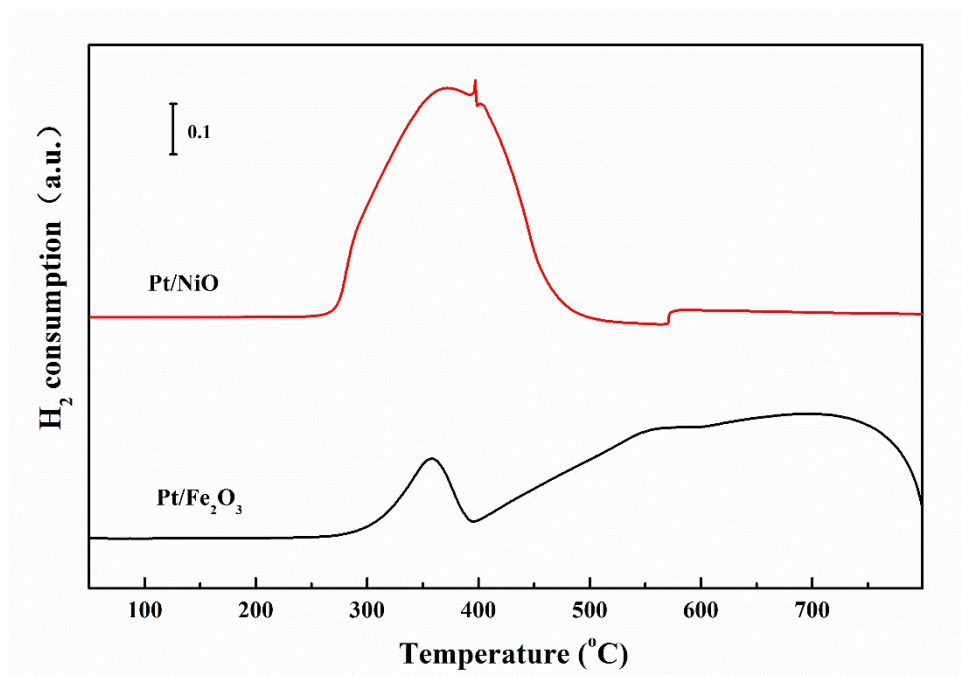

Fig.S1 the H<sub>2</sub>-TPR of Pt/NiO and Pt/Fe<sub>2</sub>O<sub>3</sub>

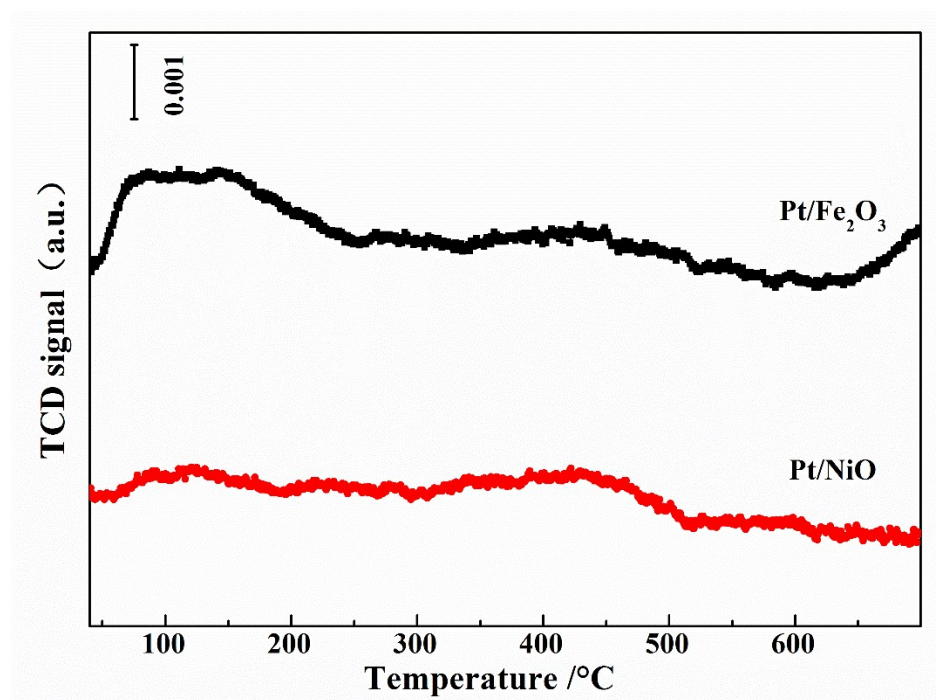

Fig.S2 the O<sub>2</sub>-TPD of Pt/Fe<sub>2</sub>O<sub>3</sub> and Pt/NiO

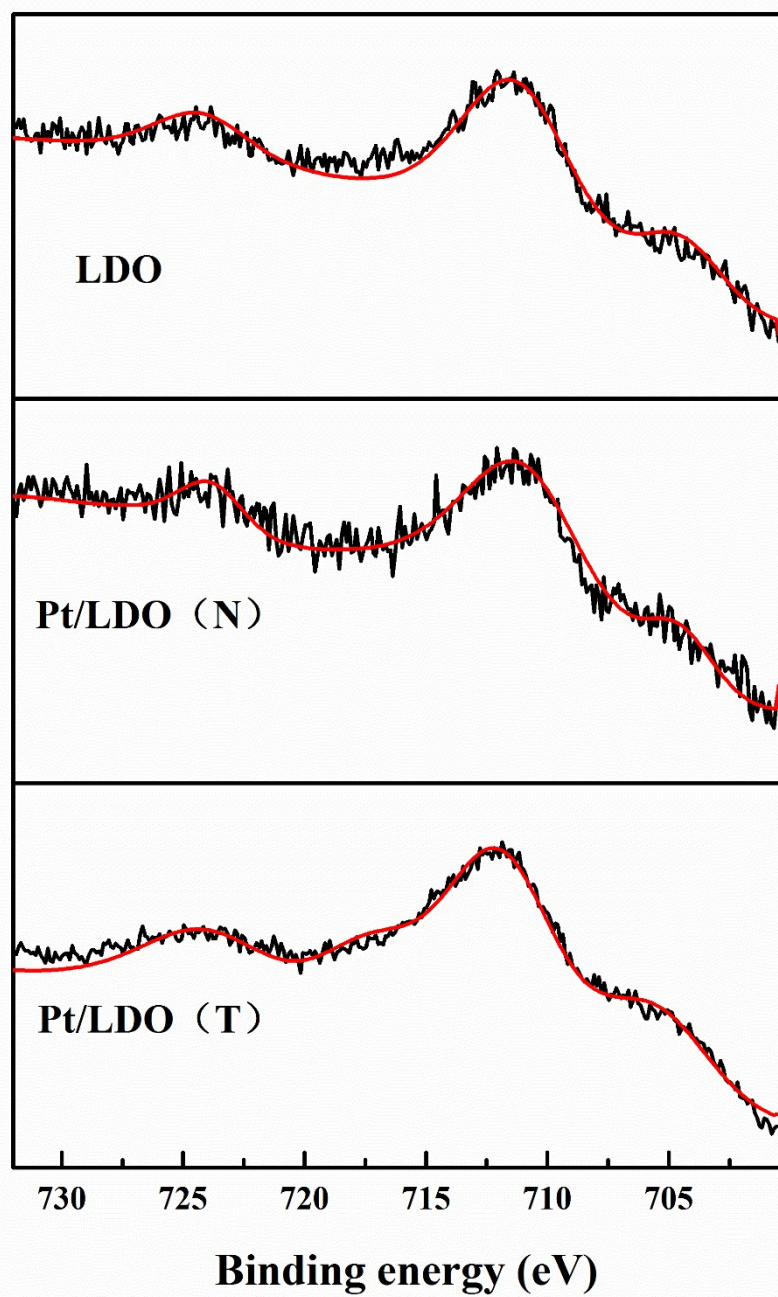

Fig.S3 Fe 2p XPS of Pt/LDO(T), Pt/LDO(N) and LDO

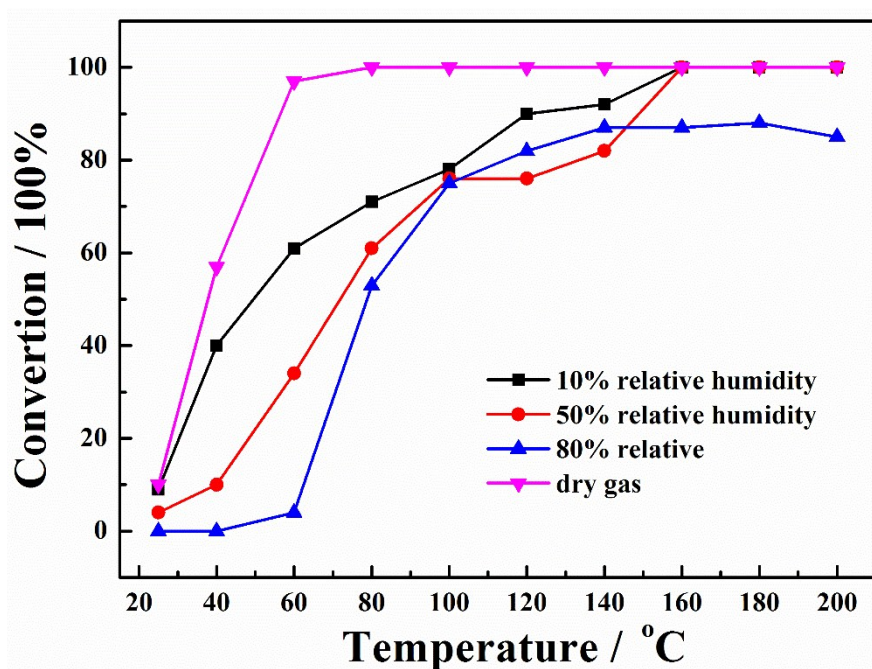

Fig. S4. The effect of relative humidity on HCHO conversion over Pt/LDO(N)

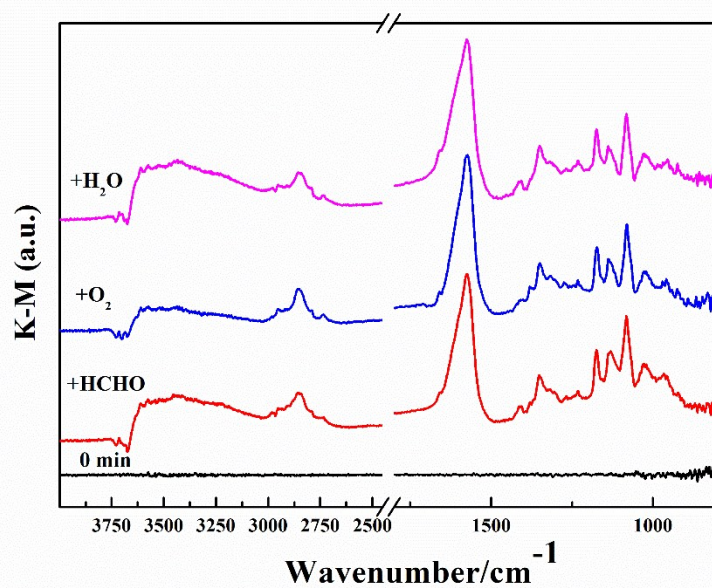

Fig. S5. In-situ DRIFT spectra of different atmospheres over Pt/LDO(N). The catalyst was first exposed in HCHO, and then the feeding gas was changed to O<sub>2</sub> and 6 % relative humidity.
